# Supplementary material for: Synthesis and solution isomerization of water-soluble Au9nanoclusters prepared by nuclearity conversion of [Au11(PPh3)8Cl2]Cl
Source: Royal Society of Chemistry journal article supplement (doi:10.1039/d1nr04401j), 2021-01-01
Supplement: d1nr04401j1.pdf [file d1nr04401j1.pdf]

## Electronic Supplementary Information

### Synthesis and Solution Isomerization of Water-Soluble Au<sub>9</sub> Nanoclusters Prepared by Nuclearity Conversion of [Au<sub>11</sub>(PPh<sub>3</sub>)<sub>8</sub>Cl<sub>2</sub>]Cl

William Ndugire and Mingdi Yan\*

Department of Chemistry, University of Massachusetts Lowell, One University Ave., Lowell, MA 01854, USA

#### Contents

|                                                                                                      |    |
|------------------------------------------------------------------------------------------------------|----|
| Syntheses .....                                                                                      | 1  |
| NMR Spectra .....                                                                                    | 2  |
| ESI-MS Spectra .....                                                                                 | 8  |
| UV-VIS Spectra .....                                                                                 | 9  |
| Proposed crystal structures of water-soluble [Au <sub>9</sub> (L) <sub>8</sub> ] <sup>3+</sup> ..... | 12 |
| Cytotoxicity of AuNCs against 3T3 cells. ....                                                        | 13 |
| Cytotoxicity of AuNCs against A549 cells. ....                                                       | 15 |
| References .....                                                                                     | 16 |

#### SYNTHESES

##### Synthesis of triphenylphosphine monosulfonate (TPPMS)

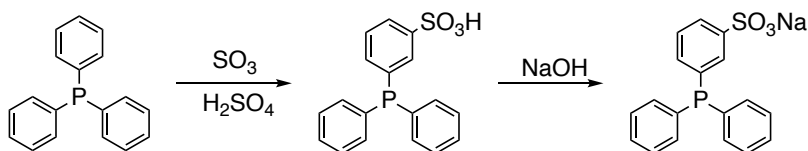

**Scheme S1.** Synthesis of triphenylphosphine monosulfonate (TPPMS).

Synthesis of TPPMS followed a reported procedure.<sup>1</sup> Fuming sulfuric acid (6 mL, 18-24% SO<sub>3</sub>) was placed in a 100-mL, three-necked flask charged with a 60-mL dropping funnel, and cooled in an ice bath to 0 °C. The ice bath as well as the reaction were stirred, and triphenylphosphine (PPh<sub>3</sub>) (2.0 g, 7.6 mmol) was added rapidly. The reaction mixture was kept at 0 °C until PPh<sub>3</sub> had completely dissolved (2 hours). The mixture was then stirred at room temperature for 18 h. Afterwards, the reaction mixture was cooled again to 0 °C, and cold water (30 mL) was added dropwise with vigorous stirring. NaOH (7.5 M, ~25 mL) was used to bring the pH to 8. A white foam-like solid was observed during neutralization process. The product was filtered with little suction then transferred to a flask, and water (50 mL) was added. The recrystallization setup was then placed in the 4° C fridge. A white solid was observed at the bottom of the flask. The product was filtered and transferred to a flask with *n*-pentane (20 mL) and sonicated for 15 minutes to remove PPh<sub>3</sub>. This process was repeated 3 times. The pentane was discarded and the white solid freeze dried to give the product as a white solid (2.0 g, 78%). <sup>1</sup>H NMR (400 MHz, D<sub>2</sub>O): δ 7.69 (d, *J* = 7.16 Hz, 1H), 7.64 (d, *J* = 7.55 Hz, 1H), 7.17 (m, 12H). <sup>31</sup>P NMR (162 MHz, D<sub>2</sub>O): δ - 5.63 (s).

##### Synthesis of triphenylphosphine gold (I) chloride (Au(PPh<sub>3</sub>)Cl)

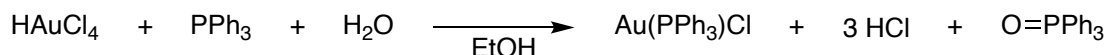

**Scheme S2.** Synthesis of Au(PPh<sub>3</sub>)Cl.

Synthesis of Au(PPh<sub>3</sub>)Cl followed a literature protocol.<sup>2</sup> Argon was bubbled into 95% ethanol for 15 min prior to use. Hydrogen tetrachloroaurate trihydrate (HAuCl<sub>4</sub>·3H<sub>2</sub>O, 0.64 g, 1.6 mmol) was placed in a two-necked 100-mL flask which was then evacuated and backfilled twice with argon. Ethanol (10 mL) was added to the flask and stirred, forming a yellow solution. To this solution, PPh<sub>3</sub> (0.86 g, 3.3 mmol) in ethanol (30 mL) was added. The mixture was colorless briefly, before a white precipitate appeared. The reaction was then stirred for 2 minutes. The product was removed by filtering through a medium porosity glass frit, washed with diethyl ether (15 mL×3), and then dried in vacuo. The solid on the frit was dissolved with DCM, which was then concentrated

to ~5 mL and then precipitated slowly on ice by pentane (added at 5 mL/hr for 4 mL). The product formed was filtered and dried in a vacuum oven. The supernatant of precipitation was repurified in the similar manner. The purified product showed a single spot on TLC (1:3 hexanes/DCM,  $R_f \sim 0.5$ ). The final product was obtained as a white solid (0.71 g, 89%).  $^1\text{H}$  NMR (400 MHz,  $\text{CDCl}_3$ ):  $\delta$  7.46 – 7.55 (m, 15H).  $^{31}\text{P}$  NMR (162 MHz,  $\text{CDCl}_3$ ):  $\delta$  33.77.

## NMR SPECTRA

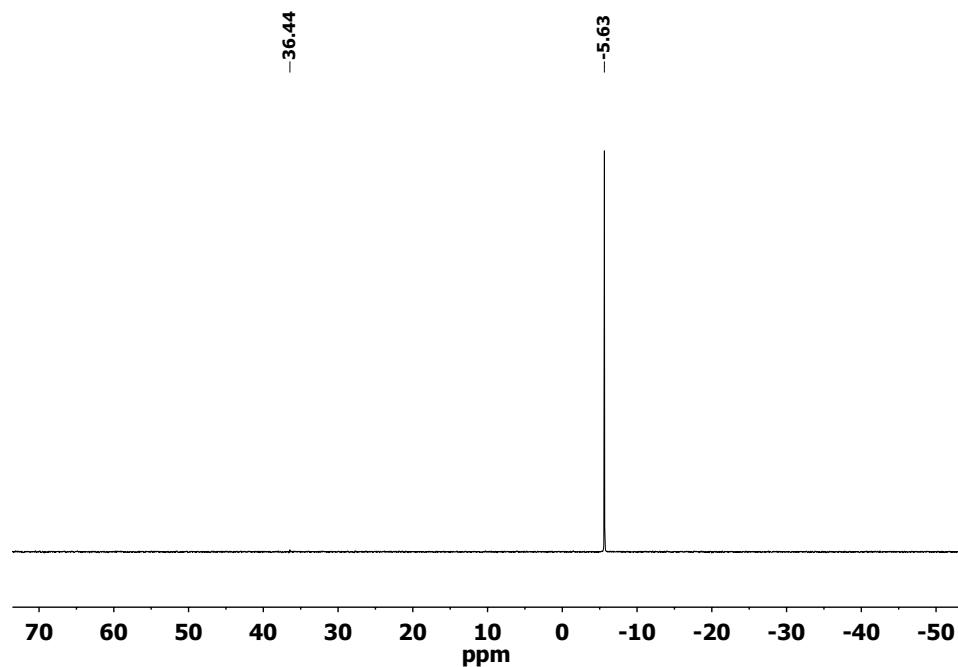

**Figure S1.**  $^{31}\text{P}$  NMR spectrum of TPPMS in  $\text{D}_2\text{O}$ . A very small amount (<1%) of the oxide (36.44 ppm) is observed in the recrystallized TPPMS.

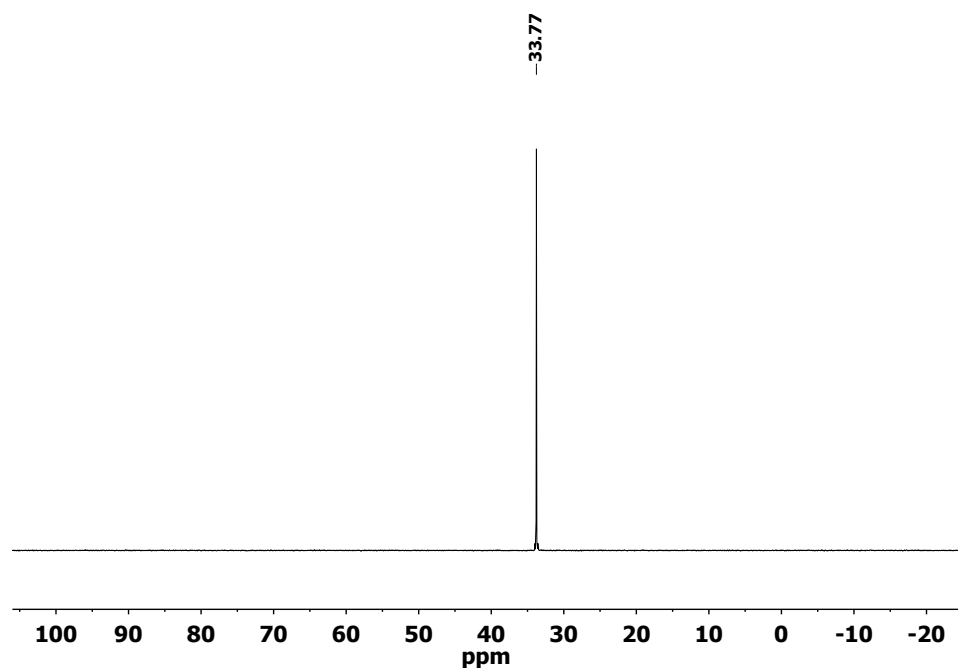

**Figure S2.**  $^{31}\text{P}$  NMR spectrum of  $\text{Au}(\text{PPh}_3)\text{Cl}$  in  $\text{CDCl}_3$ .

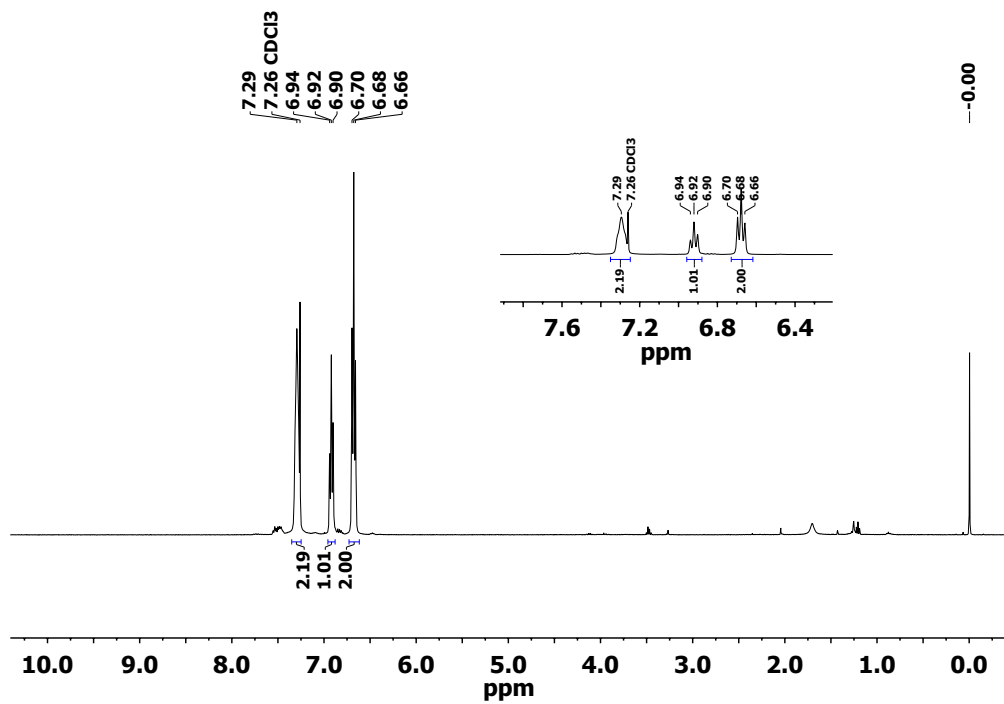

**Figure S3.**  $^1\text{H}$  NMR spectrum of  $[\text{Au}_{11}(\text{PPh}_3)_8\text{Cl}_2]\text{Cl}$  in  $\text{CDCl}_3$ .

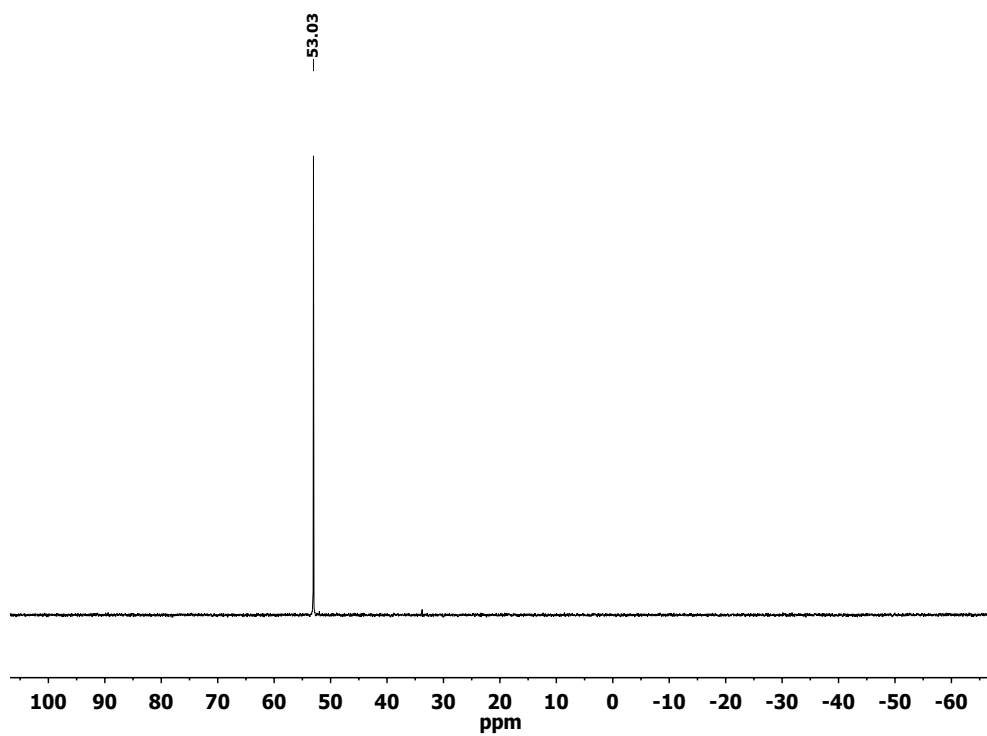

**Figure S4**  $^{31}\text{P}$  NMR spectrum of  $[\text{Au}_{11}(\text{PPh}_3)_8\text{Cl}_2]\text{Cl}$  in  $\text{CDCl}_3$ .

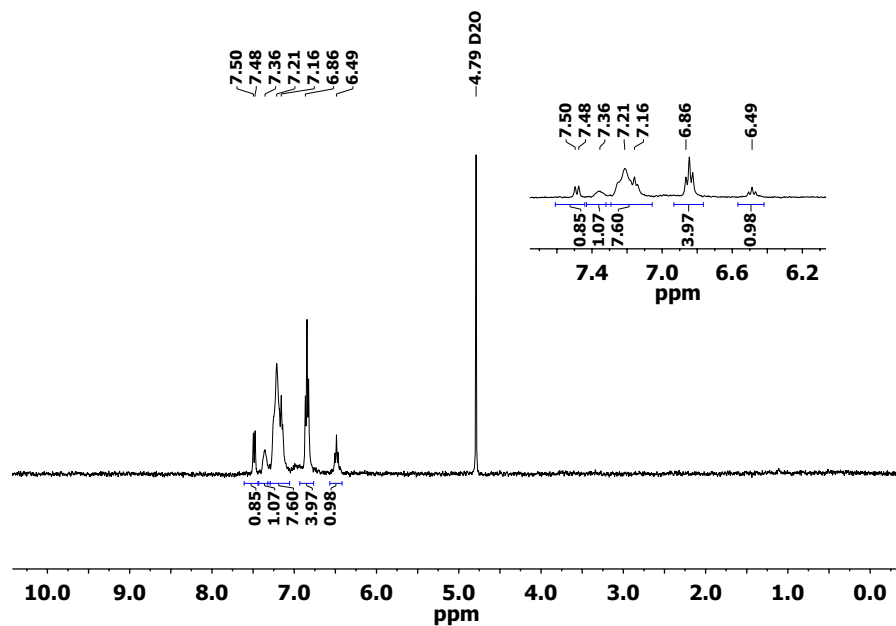

Figure S5.  $^1\text{H}$  NMR spectrum of 0.6 mM of  $[\text{Au}_9(\text{TPPMS})_8]\text{Cl}_3$  in  $\text{D}_2\text{O}$ .

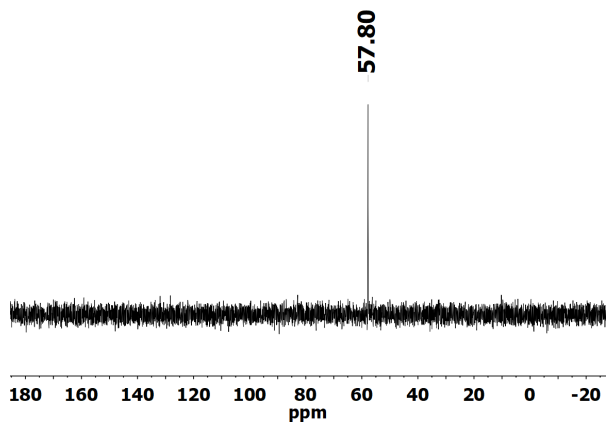

Figure S6.  $^{31}\text{P}$  NMR spectrum of  $[\text{Au}_9(\text{TPPMS})_8]\text{Cl}_3$  in  $\text{D}_2\text{O}$ .

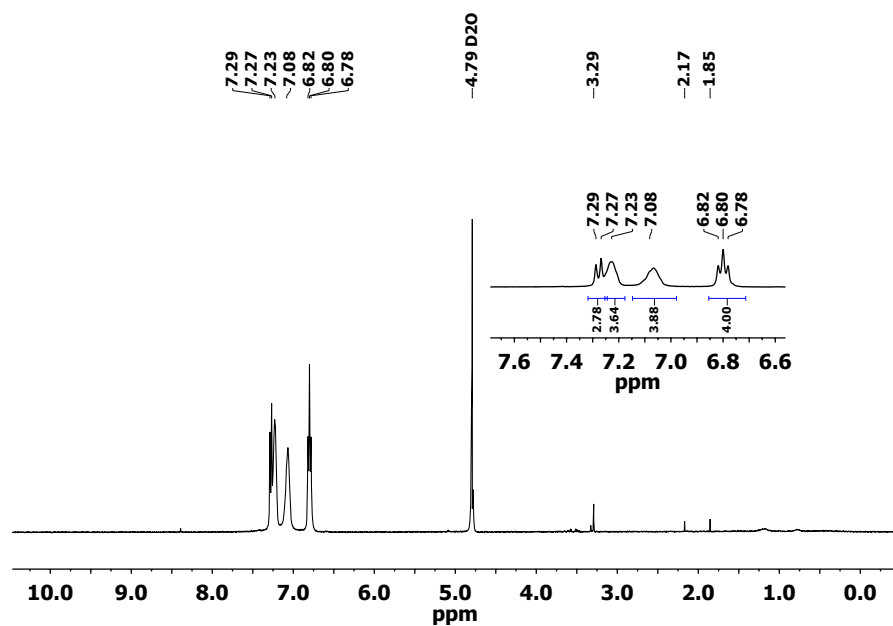

Figure S7.  $^1\text{H}$  NMR spectrum of 0.6 mM of  $[\text{Au}_9(\text{DPPBA})_8]\text{Cl}_3$  in  $\text{D}_2\text{O}$  with 20 mM NaOH.

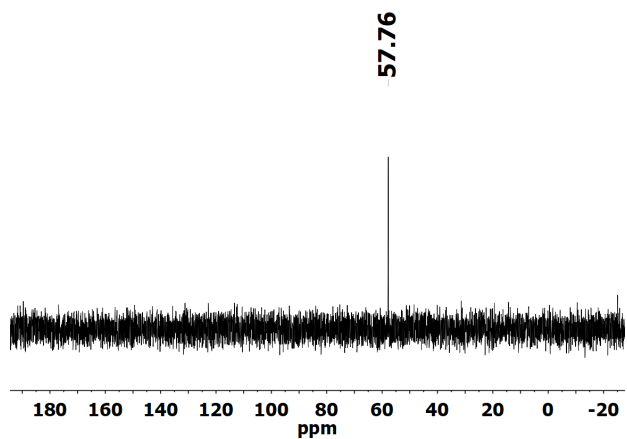

**Figure S8.**  $^{31}\text{P}$  NMR spectrum of  $[\text{Au}_9(\text{DPPBA})_8]\text{Cl}_3$  in  $\text{D}_2\text{O}$  with 20 mM NaOH.

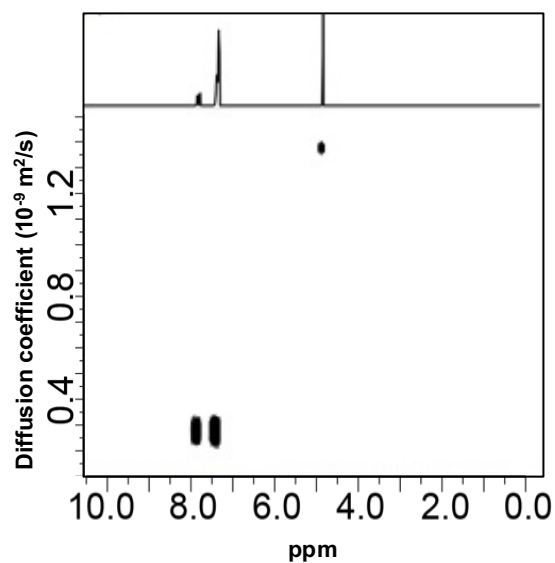

**Figure S9.** 2D DOSY NMR spectrum of TPPMS in  $\text{D}_2\text{O}$  at 289.15 K. Chemical shifts (ppm) are shown on the x-axis and the diffusion coefficients ( $10^{-9} \text{ m}^2 \text{ s}^{-1}$ ) on the y-axis of the DOSY plot.

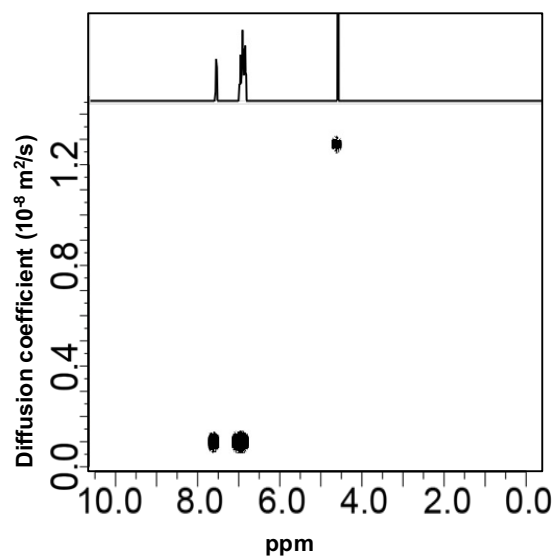

**Figure S10.** 2D DOSY NMR spectrum of DPPBA in  $\text{D}_2\text{O}$  with 20 mM NaOH at 289.15 K. Chemical shifts (ppm) are shown on the x-axis and the diffusion coefficients ( $10^{-8} \text{ m}^2 \text{ s}^{-1}$ ) on the y-axis of the DOSY plot.

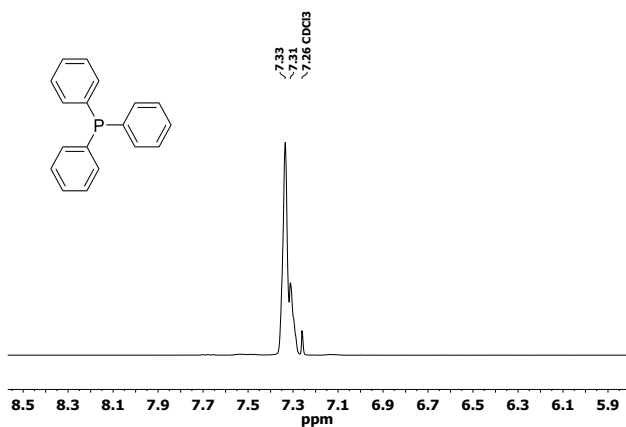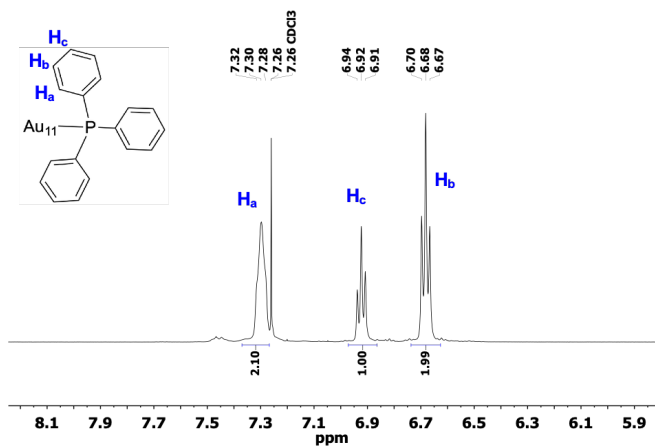

**Figure S11.**  $^1\text{H}$  NMR spectra of (A)  $\text{PPh}_3$  and (B)  $[\text{Au}_{11}(\text{PPh}_3)_8\text{Cl}_2]\text{Cl}$  in  $\text{CDCl}_3$ .

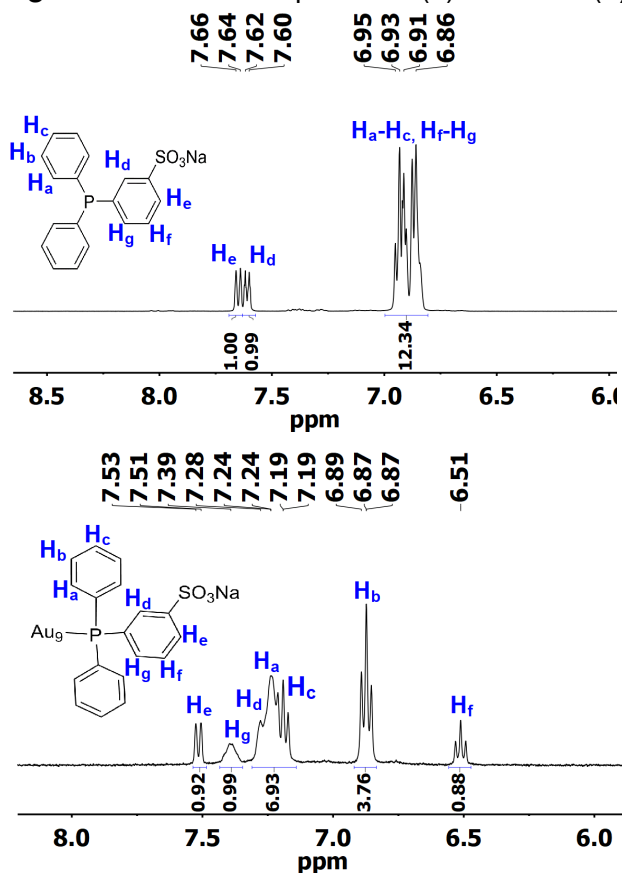

**Figure S12.**  $^1\text{H}$  NMR spectra of (A) TPPMS, and (B)  $[\text{Au}_9(\text{TPPMS})_8]\text{Cl}_3$  in  $\text{D}_2\text{O}$ . Peak assignments are aided by the 2D COSY spectrum (Fig. S14).

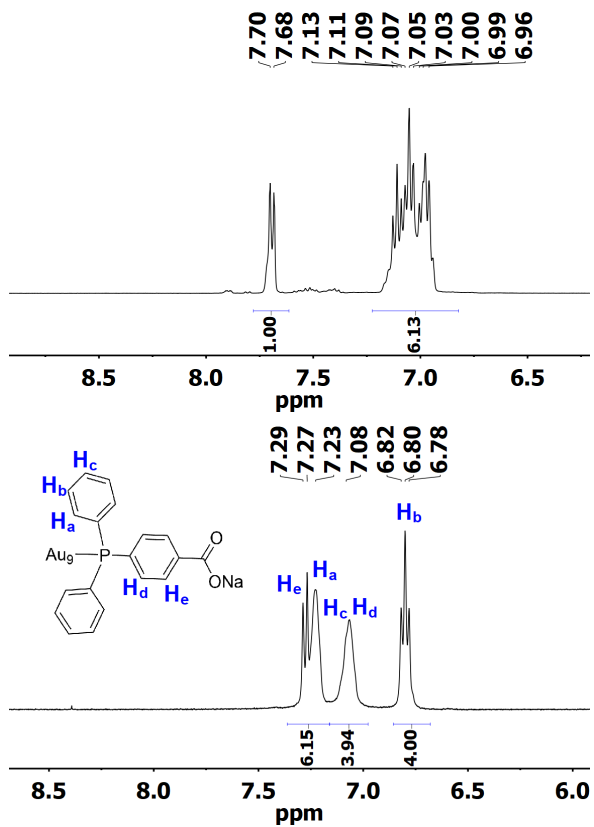

**Figure S13.**  $^1\text{H}$  NMR spectra of (A) DPPBA and (B)  $[\text{Au}_9(\text{DPPBA})_8]\text{Cl}_3$  in  $\text{D}_2\text{O}$  with 20 mM NaOH. Peak assignments are aided by the 2D COSY spectrum (Fig. S15).

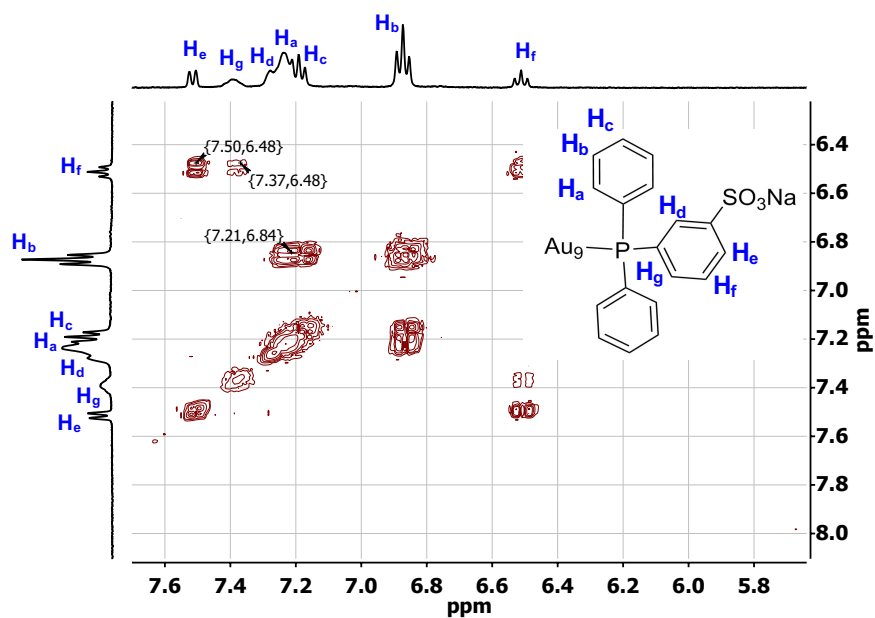

**Figure S14.**  $^1\text{H}$ - $^1\text{H}$  correlation spectra (COSY) of  $[\text{Au}_9(\text{TPPMS})_8]\text{Cl}_3$  in  $\text{D}_2\text{O}$ .

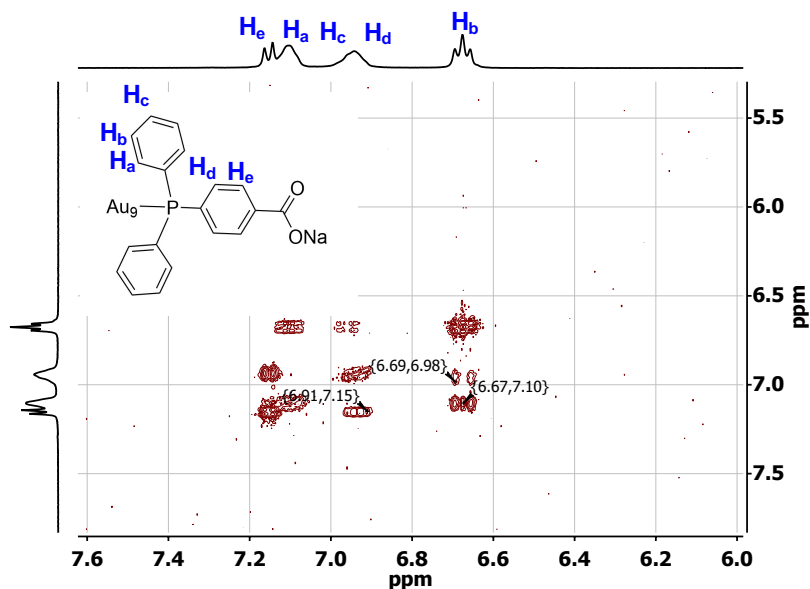

**Figure S15**  $^1\text{H}$ - $^1\text{H}$  correlation spectra (COSY) of  $[\text{Au}_9(\text{DPPBA})_8]^{3+}$  in  $\text{D}_2\text{O}$  with 20 mM of NaOH.

### ESI-MS SPECTRA

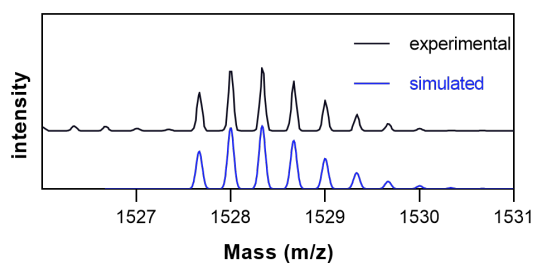

**Figure S16.** Experimental and simulated isotope peak pattern overlays of for  $1528.33\text{ m/z} = [\text{Au}_9(\text{TPPMS})_8]^{3+}\text{-SO}_3\text{Na}$ .

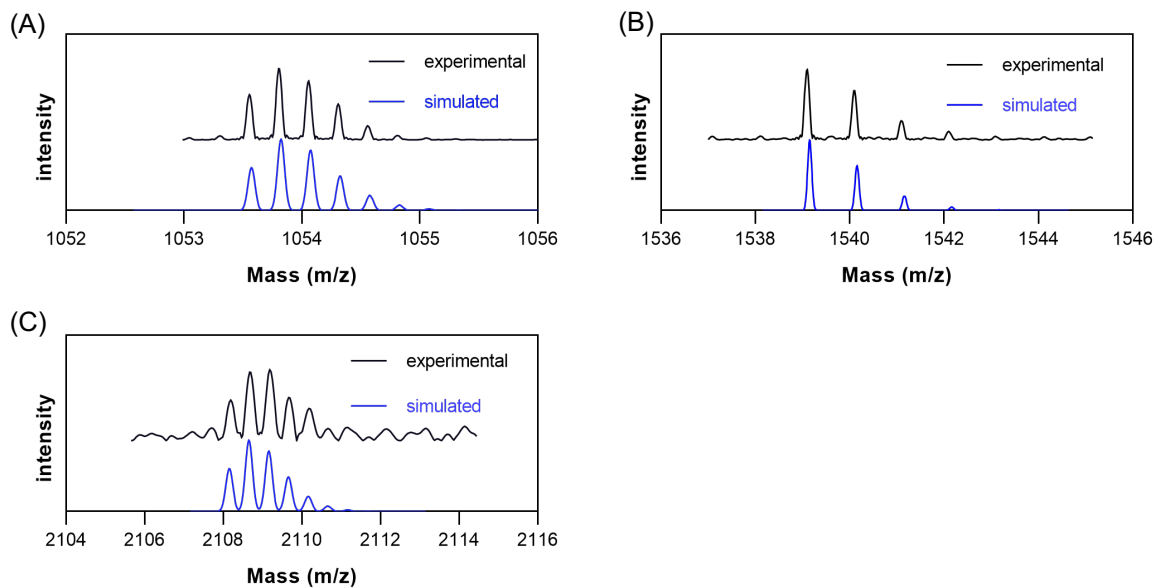

**Figure S17.** Experimental and simulated isotope peak pattern overlays of (A)  $1053.81\text{ m/z} = [\text{Au}_9(\text{DPPBA})_8 - 7\text{H}]^{4-}$ , (B)  $1539.04\text{ m/z} = [[\text{Au}_3(\text{DPPBA})_3]^{2-} + 2\text{H} + \text{CH}_3\text{O}]^{-}$  and (C)  $2108.70\text{ m/z} = [\text{Au}_9(\text{DPPBA})_8 - 5\text{H}]^{2-}$ .



## UV-VIS SPECTRA

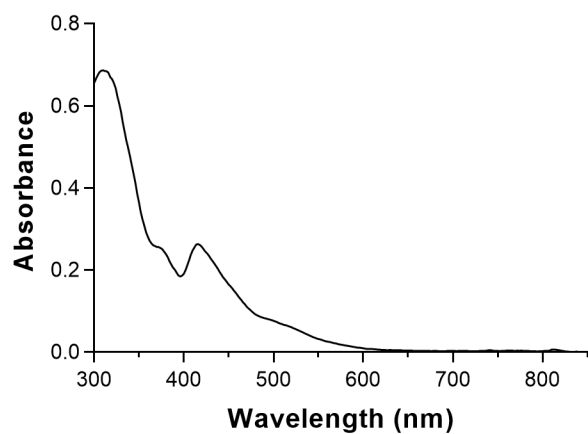

**Figure S18.** UV-Vis spectrum of [Au<sub>11</sub>(PPH<sub>3</sub>)<sub>8</sub>Cl<sub>2</sub>]Cl in DCM.

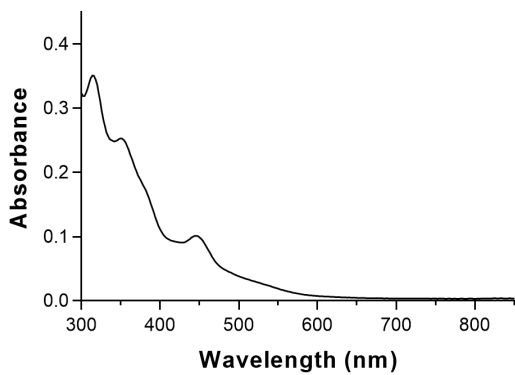

**Figure S19.** UV-Vis spectrum of [Au<sub>9</sub>(TPPMS)<sub>8</sub>]Cl<sub>3</sub> in water (0.125 mg/mL).

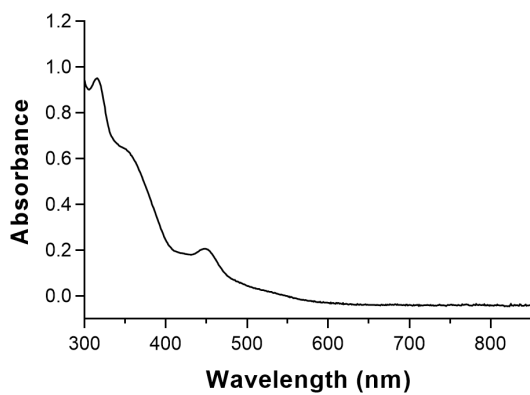

**Figure S20.** UV-Vis spectrum of [Au<sub>9</sub>(DPPBA)<sub>8</sub>]Cl<sub>3</sub> in 20 mM NaOH (0.5 mg/mL).

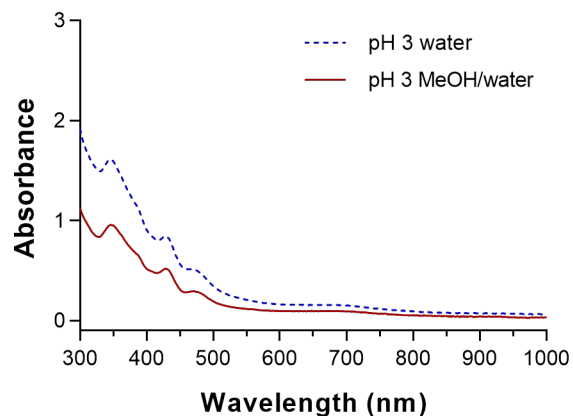

**Figure S21.** UV-Vis spectra of  $[\text{Au}_9(\text{DPPBA})_8]\text{Cl}_3$  (0.25 mg/mL) in pH 3 water (dashed line), and in pH 3 MeOH/water (1:1) (solid line).

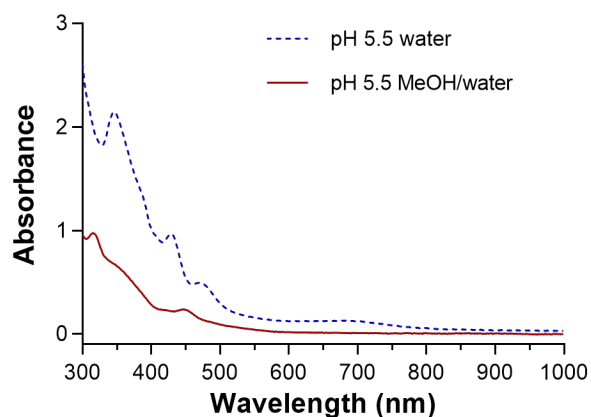

**Figure S22.** UV-Vis spectra of  $[\text{Au}_9(\text{DPPBA})_8]\text{Cl}_3$  (0.25 mg/mL) in pH 5.5 water (dashed line) and in pH 5.5 MeOH/water (1:1) (solid line).

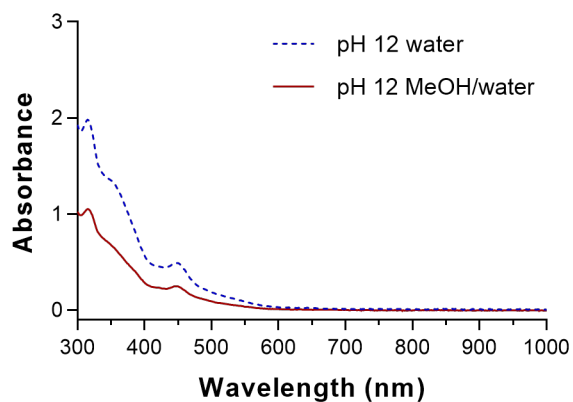

**Figure S23.** UV-Vis spectra of  $[\text{Au}_9(\text{DPPBA})_8]\text{Cl}_3$  (0.25 mg/mL) in pH 12 water (dashed line) and in pH 12 MeOH/water (1:1) (solid line).

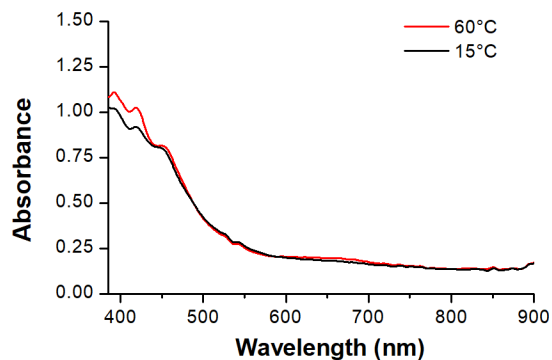

**Figure S24.** Absorption spectra of  $[\text{Au}_9(\text{DPPBA})_8]\text{Cl}_3$  in EtOH (20 mM NaOH), immediately after heating to 60 °C (red line) and after cooling to 15 °C (black line). The spectra were smoothed using an FFT filter function in OriginPRO to reduce noise.

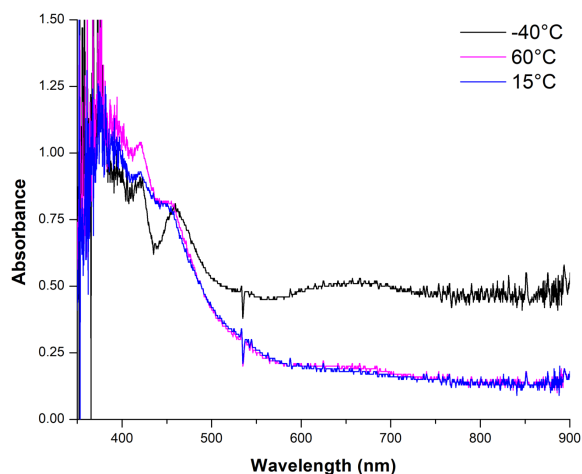

**Figure S25.** Raw Vis-NIR absorption spectra of  $\text{Au}_9(\text{DPPBA})_8\text{Cl}_3$  in ethanol. An artifact present at 535 nm arises from the light source.

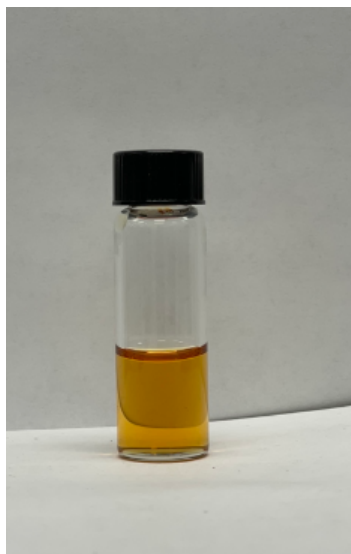

**Figure S26.**  $\text{Au}_9(\text{TPPMS})_8\text{Cl}_3$  in conc. HCl (86%, 9 M). No color change was detected. The suspension turned into a completely clear solution after 2 days.

## PROPOSED STRUCTURES OF WATER-SOLUBLE $[\text{Au}_9(\text{L})_8]^{3+}$

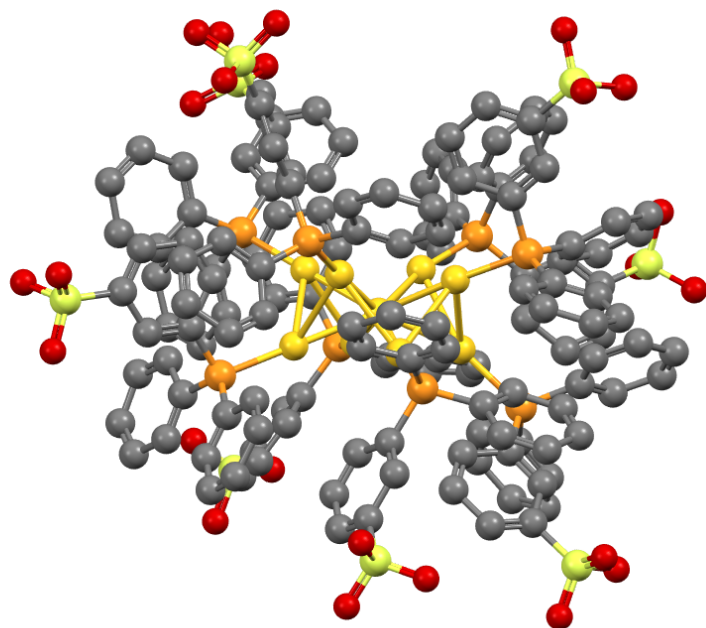

**Figure S27.** Proposed  $C_4$  'crown' isomer structure of  $\text{Au}_9(\text{TPPMS})_8\text{Cl}_3$ . The structure shows Au in yellow, P in orange, S in greenish yellow, O in red and C in grey. H atoms are omitted for clarity. Structures were obtained by replacing  $\text{P}(\text{C}_6\text{H}_4\text{OMe-}p)_3$  ligands in the  $C_4$  isomer in Ref. 3 (cf **Fig. 1A**) with TPPMS and minimizing the energy using the Universal force field algorithm (UFF) in Avogadro software.

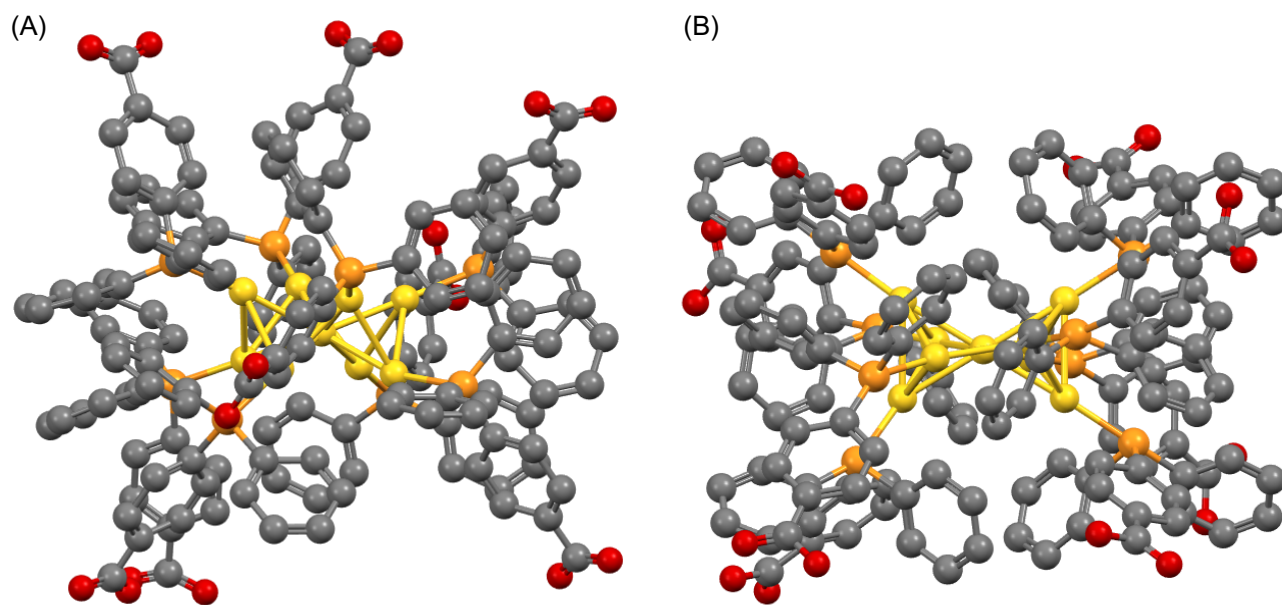

**Figure S28.** Proposed structure of  $\text{Au}_9(\text{DPPBA})_8\text{Cl}_3$  as (A) the  $C_4$  (crown) isomer and (B) the  $D_{2h}$  (butterfly) isomer. The structures show Au in yellow, P in orange, O in red and C in grey. H atoms are omitted for clarity. Structures were obtained by replacing  $\text{P}(\text{C}_6\text{H}_4\text{OMe-}p)_3$  ligands with DPPBA in the  $C_4$  and  $D_{2h}$  crystal structures in Ref. 3 (cf **Fig. 1**), and minimizing the energy using the universal force field algorithm (UFF) in the Avogadro software.

## CYTOTOXICITY OF AuNCs AGAINST 3T3 CELLS.

Dose response curves were fitted using OriginPRO software.

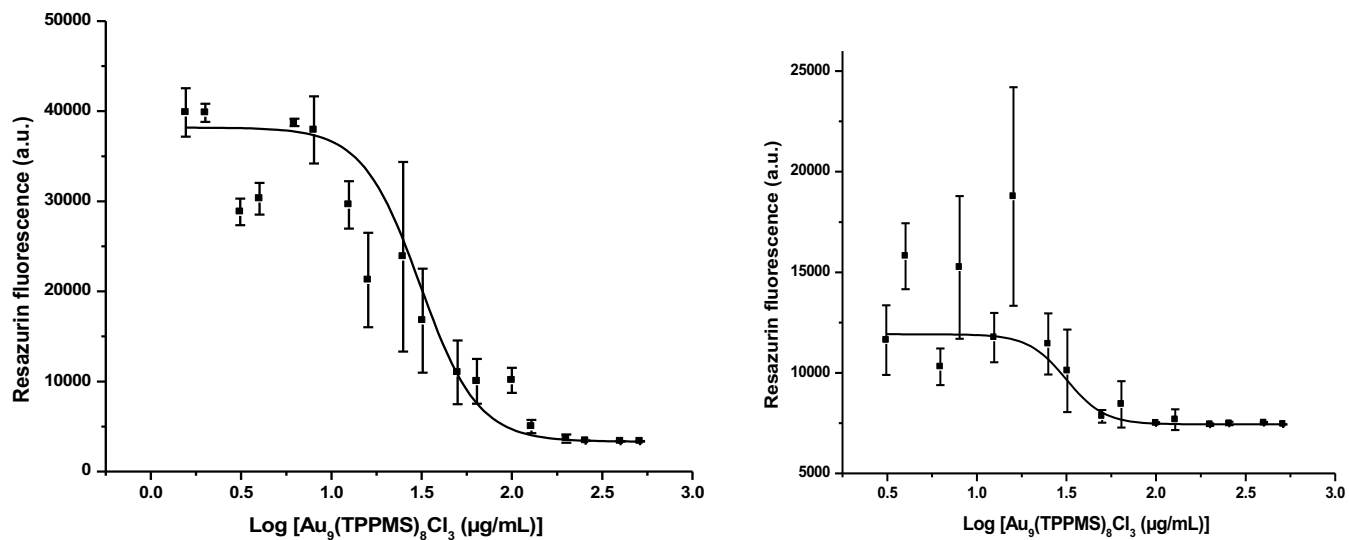

**Figure S29.** Dose-response curves of  $[\text{Au}_3(\text{TPPMS})_8]\text{Cl}_3$  on 3T3 cells: experimental data (solid squares) and the fits (lines). Each data point was the average of 3 repeats.

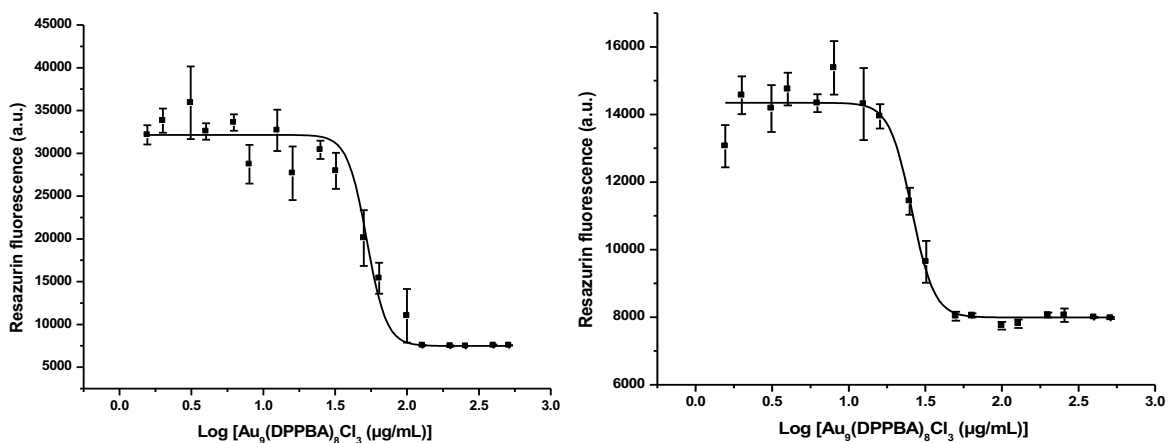

**Figure S30.** Dose-response curves of  $[\text{Au}_3(\text{DPPBA})_8]\text{Cl}_3$  on 3T3 cells: experimental data (solid squares) and the fits (lines). Each data point was the average of 3 repeats.

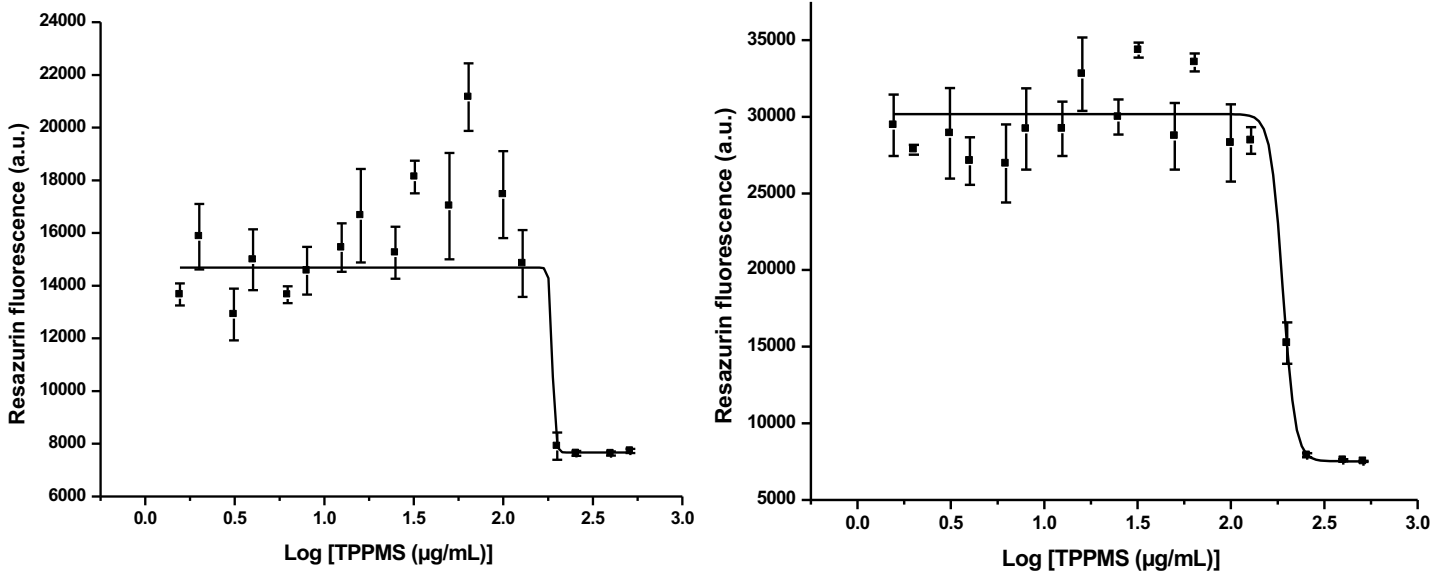

**Figure S31.** Dose-response curves of DPPBA on 3T3 cells: experimental data (solid squares) and the fits (lines). Each data point was the average of 3 repeats.

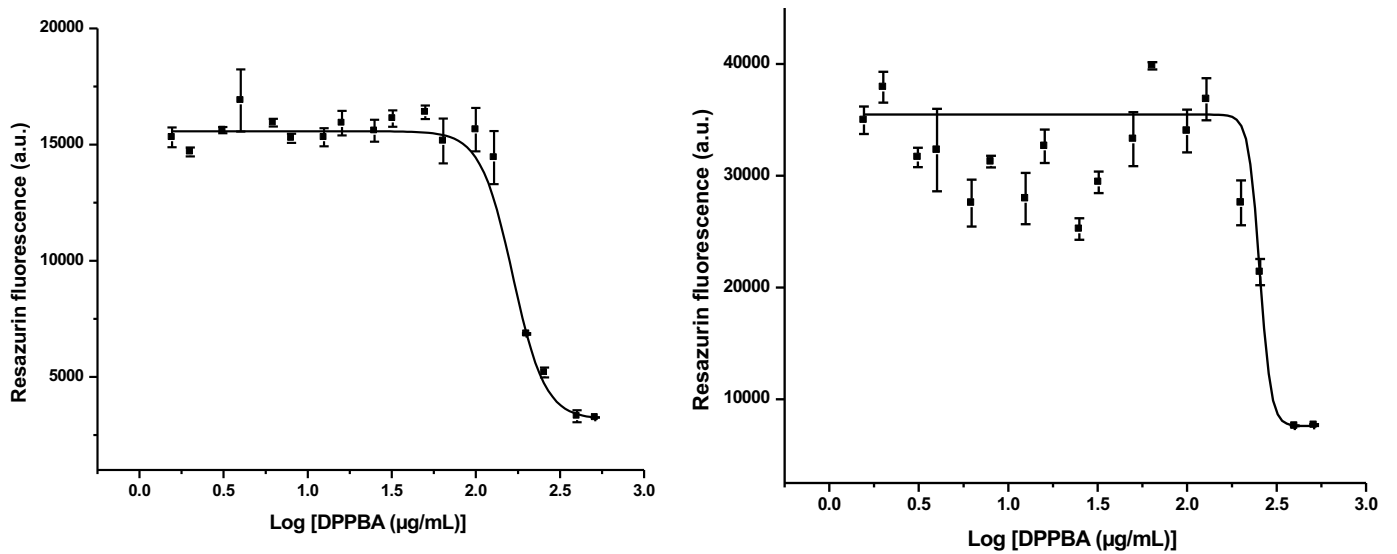

**Figure S32.** Dose-response curves of TPPMS on 3T3 cells: experimental data (solid squares) and the fits (lines). Each data point was the average of 3 repeats.

## CYTOTOXICITY OF AuNCs AGAINST A549 CELLS.

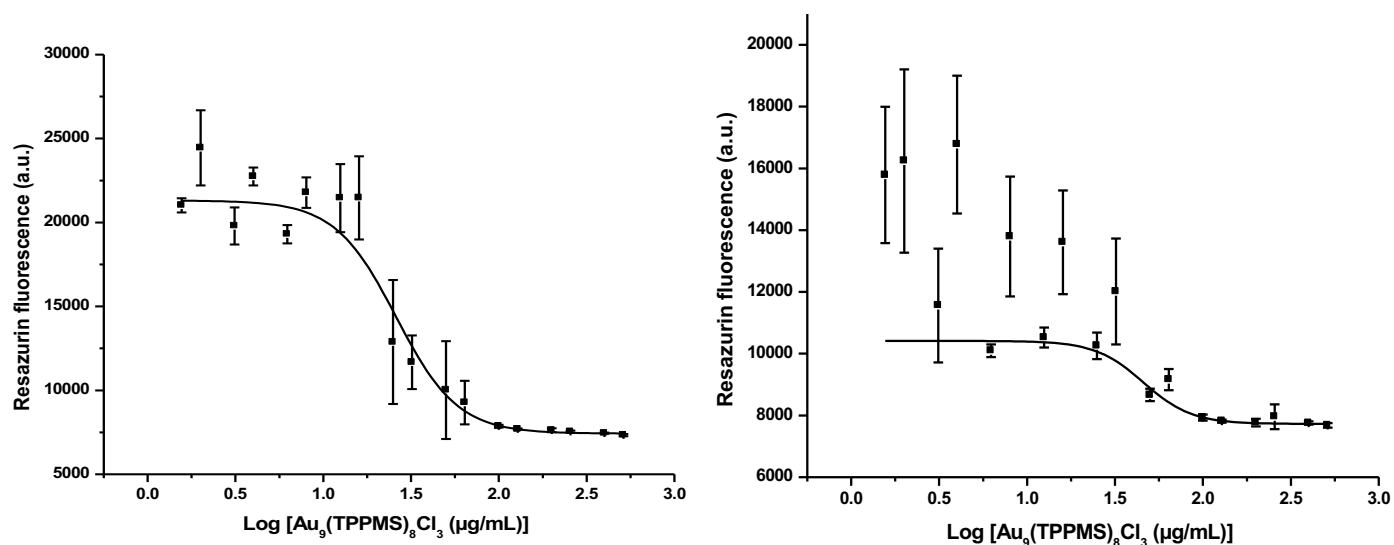

**Figure S33.** Dose-response curves of  $[\text{Au}_9(\text{TPPMS})_8]\text{Cl}_3$  on A549 cells: experimental data (solid squares) and the fits (lines). Each data point was the average of 3 repeats.

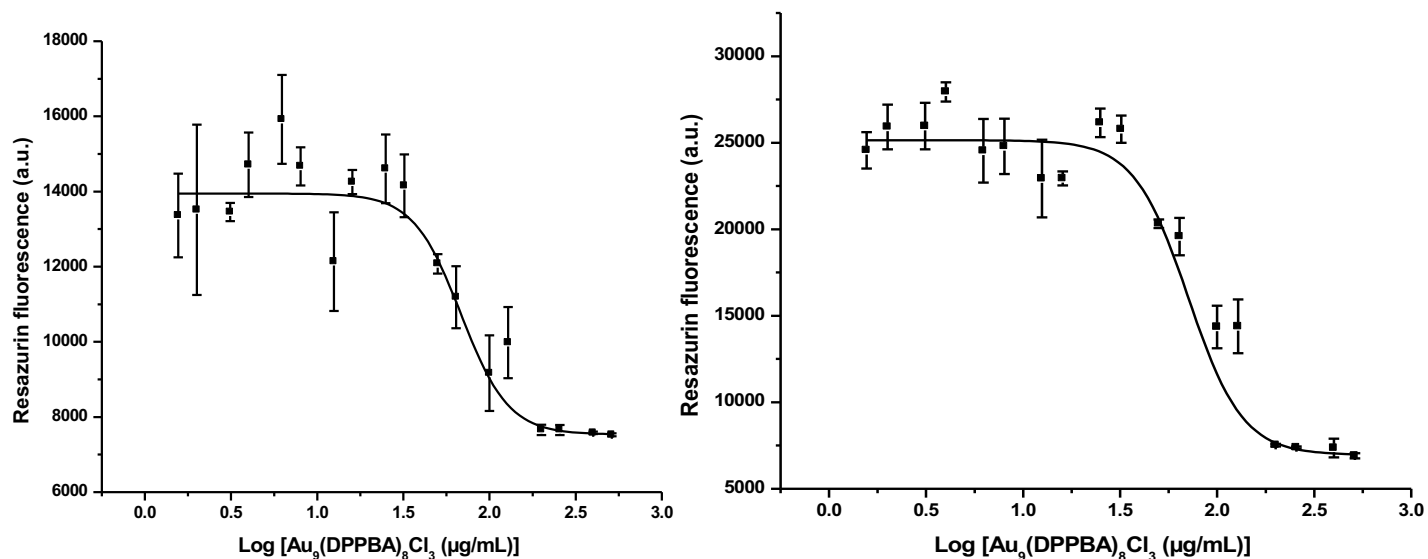

**Figure S34.** Dose-response curves of  $[\text{Au}_9(\text{DPPBA})_8]\text{Cl}_3$  on A549 cells: experimental data (solid squares) and the fits (lines). Each data point was the average of 3 repeats.

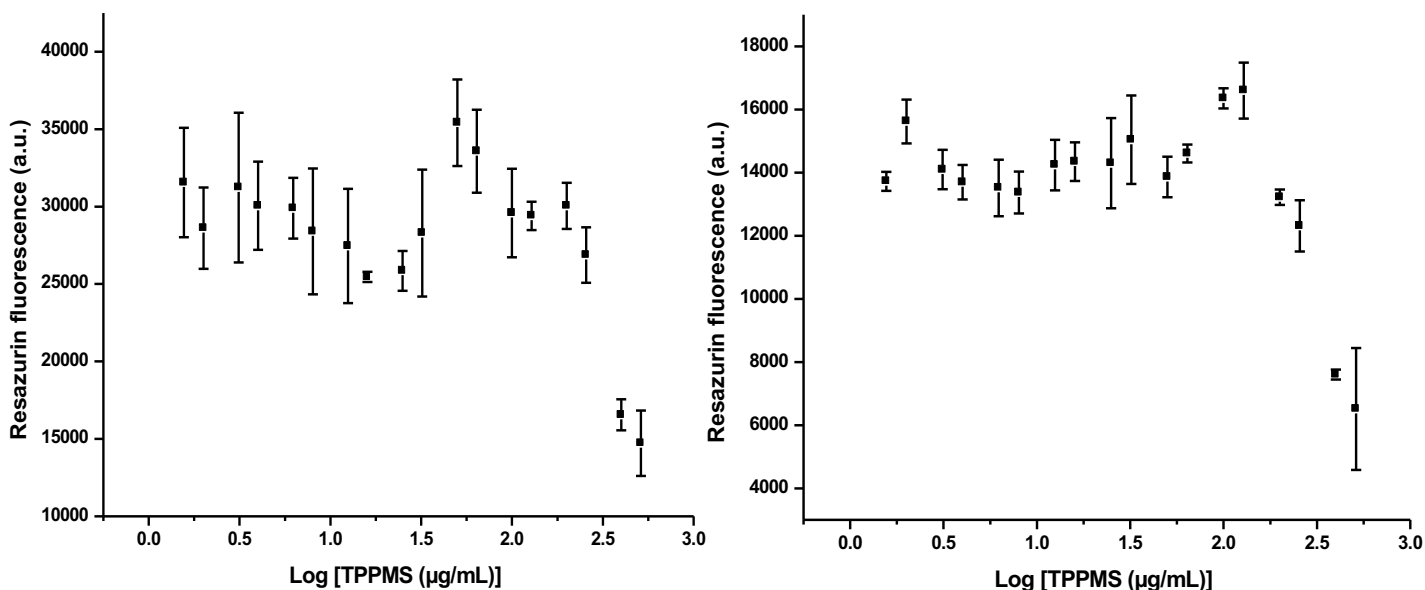

**Figure S35.** Dose-response of TPPMS on A549 cells. Each data point was the average of 3 repeats. Data are insufficient to fit a sigmoidal curve.

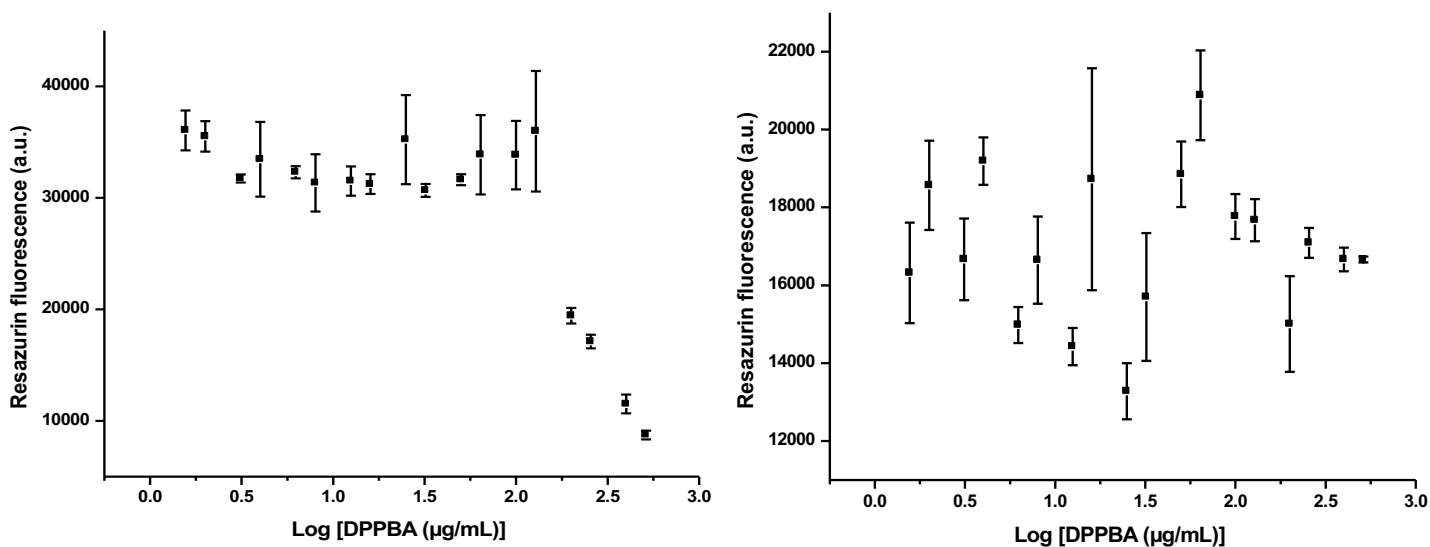

**Figure S36.** Dose-response of DPPBA on A549 cells. Each data point was the average of 3 repeats. Data are insufficient to fit a sigmoidal curve.

## REFERENCES

1. Karschin, A.; Kläui, W.; Peters, W.; Spingler, B., *Eur. J. Inorg. Chem.* **2010**, 2010 (6), 942-946.
2. Braunstein, P.; Lehner, H.; Matt, D.; Burgess, K.; Ohlmeyer, M. J., *Inorg. Synth.* **1990**, 10, 218-221.
3. Briant, C. E.; Hall, K. P.; Mingos, D. M. P., *J. Chem. Soc., Chem. Commun.* **1984**, (5), 290-291.
